# Supplementary material for: Assessing Pain Control Efficacy of Meloxicam and Ketoprofen When Compounded with Iron Dextran in Nursing Piglets Using A Navigation Chute
Source: PubMed Central journal article supplement (PMC7401524; doi:10.3390/ani10071237), 2020-07-21
Supplement: animals-10-01237-s001.pdf [file animals-10-01237-s001.pdf]

**Manuscript 850100 – Supplementary Materials**

**Table S1.** Final full model\* (model 1) of overall navigation time (sec) by treatment group using meloxicam and iron dextran (M+ID) treatment group as the referent category.

| Variable                                  | Coefficient       | SE <sup>a</sup> | z                       | p >  z | 95% Confidence Interval |
|-------------------------------------------|-------------------|-----------------|-------------------------|--------|-------------------------|
| <b>FIXED EFFECTS</b>                      |                   |                 |                         |        |                         |
| <b>Treatment<sup>b</sup></b>              |                   |                 |                         |        |                         |
| M+ID                                      | <i>Referent</i>   | ---             | ---                     | ---    | ---                     |
| M                                         | 0.11              | 2.62            | 0.04                    | 0.967  | -5.02 - 5.23            |
| K                                         | 0.87              | 2.63            | 0.33                    | 0.742  | -4.28 - 6.01            |
| K+ID                                      | -2.10             | 2.57            | -0.82                   | 0.415  | -7.13 - 2.94            |
| C+ID                                      | 8.02              | 2.59            | 3.09                    | 0.002  | 2.94 - 13.10            |
| ID-C                                      | 1.54              | 2.55            | 0.60                    | 0.547  | -3.45 - 6.53            |
| SH                                        | -0.23             | 2.61            | -0.09                   | 0.929  | -5.35 - 4.88            |
| <b>Chute Run Time Post-Castration (h)</b> | -0.26             | 0.04            | -7.03                   | <0.001 | -0.33 - -0.19           |
| <b>Baseline Navigation Time (sec)</b>     | 0.26              | 0.06            | 4.14                    | <0.001 | 0.14 - 0.38             |
| <b>Batch</b>                              |                   |                 |                         |        |                         |
| Mid-June                                  | <i>Referent</i>   | ---             | ---                     | ---    | ---                     |
| Mid-July                                  | -5.52             | 2.49            | -2.22                   | 0.026  | -10.40 - -0.65          |
| Early August                              | -6.65             | 2.49            | -2.67                   | 0.008  | -11.53 - -1.78          |
| Late August                               | -7.15             | 2.49            | -2.87                   | 0.004  | -12.04 - -2.26          |
| Late September                            | -5.58             | 2.41            | -2.32                   | 0.020  | -10.30 - -0.87          |
| <b>Back Test Score</b>                    |                   |                 |                         |        |                         |
| 0                                         | <i>Referent</i>   | ---             | ---                     | ---    | ---                     |
| 1                                         | -2.81             | 1.67            | -1.68                   | 0.093  | -6.08 - 0.47            |
| 2                                         | -4.16             | 1.82            | -2.29                   | 0.022  | -7.73 - -0.60           |
| <b>(Constant)</b>                         | 20.70             | 2.95            | 7.01                    | <0.001 | 14.91 - 26.49           |
| <b>RANDOM EFFECTS</b>                     |                   |                 |                         |        |                         |
| Variable                                  | Variance Estimate | SE <sup>a</sup> | 95% Confidence Interval |        |                         |
| <i>Individual Pig</i>                     | 8.35              | 20.65           | 0.07 - 1063.93          |        |                         |
| <i>Residual: AR1</i>                      | 180.92            | 21.54           | 143.262 - 228.48        |        |                         |

\*Mixed effects linear regression; estimated with restricted maximum likelihood estimation. <sup>a</sup>Standard Error

<sup>b</sup>Treatment Groups: M = castration + meloxicam, M+ID = castration + meloxicam + iron dextran, K = castration + ketoprofen, K+ID = castration + ketoprofen + iron dextran, C+ID = castration without analgesia + iron dextran, ID-C = iron dextran without castration, SH = sham handling without castration or injection.

**Table S2.** Final full model\* (model 1) of overall navigation time (sec) by treatment group using ketoprofen and iron dextran (K+ID) treatment group as the referent category.

| Variable                                  | Coefficient       | SE <sup>a</sup> | z                       | p >  z | 95% Confidence Interval |
|-------------------------------------------|-------------------|-----------------|-------------------------|--------|-------------------------|
| <b>FIXED EFFECTS</b>                      |                   |                 |                         |        |                         |
| <i>Treatment<sup>b</sup></i>              |                   |                 |                         |        |                         |
| K+ID                                      | <i>Referent</i>   | ---             | ---                     | ---    | ---                     |
| M                                         | 2.20              | 2.60            | 0.85                    | 0.396  | -2.88 - 7.30            |
| M+ID                                      | 2.10              | 2.57            | 0.82                    | 0.415  | -2.94 - 7.14            |
| K                                         | 2.96              | 2.61            | 1.13                    | 0.256  | -2.15 - 8.08            |
| C+ID                                      | 10.12             | 2.58            | 3.92                    | <0.001 | 5.06 - 15.18            |
| ID-C                                      | 3.63              | 2.59            | 1.40                    | 0.160  | -1.44 - 8.70            |
| SH                                        | 1.86              | 2.61            | 0.71                    | 0.475  | -3.25 - 6.98            |
| <i>Chute Run Time Post-Castration (h)</i> | -0.26             | 0.04            | -7.03                   | <0.001 | -0.33 - -0.19           |
| <i>Baseline Navigation Time (sec)</i>     | 0.26              | 0.06            | 4.14                    | <0.001 | 0.14 - 0.38             |
| <i>Batch</i>                              |                   |                 |                         |        |                         |
| Mid-June                                  | <i>Referent</i>   | ---             | ---                     | ---    | ---                     |
| Mid-July                                  | -5.52             | 2.49            | -2.22                   | 0.026  | -10.40 - -0.65          |
| Early August                              | -6.65             | 2.49            | -2.67                   | 0.008  | -11.53 - -1.78          |
| Late August                               | -7.15             | 2.49            | -2.87                   | 0.004  | -12.04 - -2.26          |
| Late September                            | -5.58             | 2.41            | -2.32                   | 0.020  | -10.30 - -0.87          |
| <i>Back Test Score</i>                    |                   |                 |                         |        |                         |
| 0                                         | <i>Referent</i>   | ---             | ---                     | ---    | ---                     |
| 1                                         | -2.81             | 1.67            | -1.68                   | 0.093  | -6.08 - 0.47            |
| 2                                         | -4.16             | 1.82            | -2.29                   | 0.022  | -7.73 - -0.60           |
| <i>(Constant)</i>                         | 18.61             | 3.12            | 5.95                    | <0.001 | 12.48 - 24.73           |
| <b>RANDOM EFFECTS</b>                     |                   |                 |                         |        |                         |
| Variable                                  | Variance Estimate | SE <sup>a</sup> | 95% Confidence Interval |        |                         |
| <i>Individual Pig</i>                     | 8.35              | 20.65           | 0.07 - 1063.93          |        |                         |
| <i>Residual: AR1</i>                      | 180.92            | 21.54           | 143.262 - 228.48        |        |                         |

\*Mixed effects linear regression; estimated with restricted maximum likelihood estimation. <sup>a</sup>Standard Error

<sup>b</sup>Treatment Groups: M = castration + meloxicam, M+ID = castration + meloxicam + iron dextran, K = castration + ketoprofen, K+ID = castration + ketoprofen + iron dextran, C+ID = castration without analgesia + iron dextran, ID-C = iron dextran without castration, SH = sham handling without castration or injection.

**Table S3.** Final full model\* (model 1) of overall navigation time (sec) by treatment group using castration without analgesia and iron dextran (C+ID) treatment group as the referent category.

| Variable                                    | Coefficient       | SE <sup>a</sup> | z                       | p >  z | 95% Confidence Interval |
|---------------------------------------------|-------------------|-----------------|-------------------------|--------|-------------------------|
| <b>FIXED EFFECTS</b>                        |                   |                 |                         |        |                         |
| <i>Treatment<sup>b</sup></i>                |                   |                 |                         |        |                         |
| C+ID                                        | <i>Referent</i>   | ---             | ---                     | ---    | ---                     |
| M                                           | -7.91             | 2.61            | -3.03                   | 0.002  | -13.04 - -2.79          |
| M+ID                                        | -8.02             | 2.59            | -3.09                   | 0.002  | -13.10 - -2.94          |
| K                                           | -7.15             | 2.65            | -2.70                   | 0.007  | -12.35 - -1.97          |
| K+ID                                        | -10.12            | 2.58            | -3.92                   | 0.000  | -15.18 - -5.06          |
| ID-C                                        | -6.48             | 2.60            | -2.49                   | 0.013  | -11.58 - -1.39          |
| SH                                          | -8.26             | 2.63            | -3.14                   | 0.002  | -13.42 - -3.10          |
| <i>Chute Run Time Post-Castration (hrs)</i> | -0.26             | 0.04            | -7.03                   | <0.001 | -0.33 - -0.19           |
| <i>Baseline Navigation Time (sec)</i>       | 0.26              | 0.06            | 4.14                    | <0.001 | 0.14 - 0.38             |
| <i>Batch</i>                                |                   |                 |                         |        |                         |
| Mid-June                                    | <i>Referent</i>   | ---             | ---                     | ---    | ---                     |
| Mid-July                                    | -5.52             | 2.49            | -2.22                   | 0.026  | -10.40 - -0.65          |
| Early August                                | -6.65             | 2.49            | -2.67                   | 0.008  | -11.53 - -1.78          |
| Late August                                 | -7.15             | 2.49            | -2.87                   | 0.004  | -12.04 - -2.26          |
| Late September                              | -5.58             | 2.41            | -2.32                   | 0.020  | -10.30 - -0.87          |
| <i>Back Test Score</i>                      |                   |                 |                         |        |                         |
| 0                                           | <i>Referent</i>   | ---             | ---                     | ---    | ---                     |
| 1                                           | -2.81             | 1.67            | -1.68                   | 0.093  | -6.08 - 0.47            |
| 2                                           | -4.16             | 1.82            | -2.29                   | 0.022  | -7.73 - -0.60           |
| <i>(Constant)</i>                           | 28.72             | 3.06            | 9.39                    | <0.001 | 22.73 - 34.72           |
| <b>RANDOM EFFECTS</b>                       |                   |                 |                         |        |                         |
| Variable                                    | Variance Estimate | SE <sup>a</sup> | 95% Confidence Interval |        |                         |
| <i>Individual Pig</i>                       | 8.35              | 20.65           | 0.07 - 1063.93          |        |                         |
| <i>Residual: AR1</i>                        | 180.92            | 21.54           | 143.262 - 228.48        |        |                         |

\*Mixed effects linear regression; estimated with restricted maximum likelihood estimation. <sup>a</sup>Standard Error.

<sup>b</sup>Treatment Groups: M = castration + meloxicam, M+ID = castration + meloxicam + iron dextran, K = castration + ketoprofen, K+ID = castration + ketoprofen + iron dextran, C+ID = castration without analgesia + iron dextran, ID-C = iron dextran without castration, SH = sham handling without castration or injection.

**Table S4.** Final full model\* (model 3) of cortisol (nmol/L) 1-h post-castration by treatment group using meloxicam and iron dextran (M+ID) treatment group as the referent category.

| Variable                               | Coefficient          | SE <sup>a</sup> | z                       | p >  z | 95% Confidence Interval |
|----------------------------------------|----------------------|-----------------|-------------------------|--------|-------------------------|
| <b>FIXED EFFECTS</b>                   |                      |                 |                         |        |                         |
| <i>Treatment<sup>b</sup></i>           |                      |                 |                         |        |                         |
| M+ID                                   | <i>Referent</i>      | ---             | ---                     | ---    | ---                     |
| M                                      | 0.27                 | 20.69           | 0.01                    | 0.989  | -40.29 - 40.83          |
| K                                      | -27.24               | 20.72           | -1.31                   | 0.189  | -67.85 - 13.37          |
| K+ID                                   | -23.08               | 20.76           | -1.11                   | 0.266  | -63.77 - 17.60          |
| C+ID                                   | 77.82                | 20.92           | 3.72                    | <0.001 | 36.81 - 118.83          |
| ID-C                                   | -45.40               | 20.71           | -2.19                   | 0.028  | -85.98 - -4.81          |
| SH                                     | -28.02               | 20.84           | -1.34                   | 0.179  | -68.86 - 12.83          |
| <i>Treatment Day Weight (per 100g)</i> | -5.59                | 1.40            | -4.00                   | <0.001 | -8.33 - -2.85           |
| <i>Castrator</i>                       |                      |                 |                         |        |                         |
| A                                      | <i>Referent</i>      | ---             | ---                     | ---    | ---                     |
| B                                      | -124.57              | 36.36           | -3.43                   | 0.001  | -195.83 - -53.31        |
| C                                      | -116.05              | 38.61           | -3.01                   | 0.003  | -191.72 - -40.39        |
| D                                      | -163.30              | 48.04           | -3.40                   | 0.001  | -257.47 - -69.14        |
| <i>(Constant)</i>                      | 433.39               | 46.24           | 9.37                    | <0.001 | 342.77 - 524.01         |
| <b>RANDOM EFFECTS</b>                  |                      |                 |                         |        |                         |
| Variable                               | Variance Estimate    | SE <sup>a</sup> | 95% Confidence Interval |        |                         |
| <i>Litter</i>                          | 1544.32 <sup>c</sup> | 678.76          | 652.55 - 3654.74        |        |                         |

\*Linear Mixed model, accounting for clustering at the litter level, and controlling for covariates of treatment day weight (dg), and individual castrator effect <sup>a</sup>Standard Error <sup>b</sup>Treatment Groups: M = castration + meloxicam, M+ID = castration + meloxicam + iron dextran, K = castration + ketoprofen, K+ID = castration + ketoprofen + iron dextran, C+ID = castration without analgesia + iron dextran, ID-C = iron dextran without castration, SH = sham handling without castration or injection. <sup>c</sup>Variance Partition Coefficient of Litter = 0.224.

**Table S5.** Final full model\* (model 3) of cortisol (nmol/L) 1-hr post-castration by treatment group using ketoprofen and iron dextran (K+ID) treatment group as the referent category.

| Variable                               | Coefficient          | SE <sup>a</sup> | z                       | p >  z | 95% Confidence Interval |
|----------------------------------------|----------------------|-----------------|-------------------------|--------|-------------------------|
| <b>FIXED EFFECTS</b>                   |                      |                 |                         |        |                         |
| <i>Treatment<sup>b</sup></i>           |                      |                 |                         |        |                         |
| K+ID                                   | <i>Referent</i>      | ---             | ---                     | ---    | ---                     |
| M                                      | 23.36                | 20.83           | 1.12                    | 0.262  | -17.47 - 64.18          |
| M+ID                                   | 23.08                | 20.76           | 1.11                    | 0.266  | -17.60 - 63.77          |
| K                                      | -4.16                | 20.69           | -0.20                   | 0.841  | -44.71 - 36.39          |
| C+ID                                   | 100.90               | 21.04           | 4.80                    | <0.001 | 59.66 - 142.15          |
| ID-C                                   | -22.31               | 20.87           | -1.07                   | 0.285  | -63.22 - 18.60          |
| SH                                     | -4.93                | 21.13           | -0.23                   | 0.815  | -46.35 - 36.49          |
| <i>Treatment Day Weight (per 100g)</i> | -5.59                | 1.40            | -4.00                   | <0.001 | -8.33 - -2.85           |
| <i>Castrator</i>                       |                      |                 |                         |        |                         |
| A                                      | <i>Referent</i>      | ---             | ---                     | ---    | ---                     |
| B                                      | -124.57              | 36.36           | -3.43                   | 0.001  | -195.83 - -53.31        |
| C                                      | -116.05              | 38.61           | -3.01                   | 0.003  | -191.72 - -40.39        |
| D                                      | -163.30              | 48.04           | -3.40                   | 0.001  | -257.47 - -69.14        |
| <i>(Constant)</i>                      | 433.39               | 46.24           | 9.37                    | <0.001 | 342.77 - 524.01         |
| <b>RANDOM EFFECTS</b>                  |                      |                 |                         |        |                         |
| Variable                               | Variance Estimate    | SE <sup>a</sup> | 95% Confidence Interval |        |                         |
| <i>Litter</i>                          | 1544.32 <sup>c</sup> | 678.76          | 652.55 - 3654.74        |        |                         |

\*Linear Mixed model, accounting for clustering at the litter level, and controlling for covariates of treatment day weight (dg), and individual castrator effect <sup>a</sup>Standard Error <sup>b</sup>Treatment Groups: M = castration + meloxicam, M+ID = castration + meloxicam + iron dextran, K = castration + ketoprofen, K+ID = castration + ketoprofen + iron dextran, C+ID = castration without analgesia + iron dextran, ID-C = iron dextran without castration, SH = sham handling without castration or injection. <sup>c</sup>Variance Partition Coefficient of Litter = 0.224.

**Table S6.** Final full model\* (model 3) of cortisol (nmol/L) 1-h post-castration by treatment group using castration without analgesia and iron dextran (C+ID) treatment group as the referent category.

| Variable                                   | Coefficient          | SE <sup>a</sup> | z                       | p >  z | 95% Confidence Interval |
|--------------------------------------------|----------------------|-----------------|-------------------------|--------|-------------------------|
| <b>FIXED EFFECTS</b>                       |                      |                 |                         |        |                         |
| <i>Treatment<sup>b</sup></i>               |                      |                 |                         |        |                         |
| C+ID                                       | <i>Referent</i>      | ---             | ---                     | ---    | ---                     |
| M                                          | -77.55               | 20.92           | -3.71                   | <0.001 | -118.55 - -36.54        |
| M+ID                                       | -77.82               | 20.92           | -3.72                   | <0.001 | -118.83 - -36.81        |
| K                                          | -105.06              | 20.99           | -5.01                   | <0.001 | -146.20 - -63.92        |
| K+ID                                       | -100.90              | 21.04           | -4.80                   | <0.001 | -142.15 - -59.66        |
| ID-C                                       | -123.22              | 20.93           | -5.89                   | <0.001 | -164.23 - -82.20        |
| SH                                         | -105.84              | 21.02           | -5.03                   | <0.001 | -147.04 - -64.64        |
| <i>Treatment Day Weight<br/>(per 100g)</i> | -5.59                | 1.40            | -4.00                   | <0.001 | -8.33 - -2.85           |
| <i>Castrator</i>                           |                      |                 |                         |        |                         |
| A                                          | <i>Referent</i>      | ---             | ---                     | ---    | ---                     |
| B                                          | -124.57              | 36.36           | -3.43                   | 0.001  | -195.83 - -53.31        |
| C                                          | -116.05              | 38.61           | -3.01                   | 0.003  | -191.72 - -40.39        |
| D                                          | -163.30              | 48.04           | -3.40                   | 0.001  | -257.47 - -69.14        |
| <i>(Constant)</i>                          | 433.39               | 46.24           | 9.37                    | <0.001 | 342.77 - 524.01         |
| <b>RANDOM EFFECTS</b>                      |                      |                 |                         |        |                         |
| Variable                                   | Variance Estimate    | SE <sup>a</sup> | 95% Confidence Interval |        |                         |
| <i>Litter</i>                              | 1544.32 <sup>c</sup> | 678.76          | 652.55 - 3654.74        |        |                         |

\*Linear Mixed model, accounting for clustering at the litter level, and controlling for covariates of treatment day weight (dg), and individual castrator effect; <sup>a</sup>Standard Error; <sup>b</sup>Treatment Groups: M = castration + meloxicam, M+ID = castration + meloxicam + iron dextran, K = castration + ketoprofen, K+ID = castration + ketoprofen + iron dextran, C+ID = castration without analgesia + iron dextran, ID-C = iron dextran without castration, SH = sham handling without castration or injection; <sup>c</sup>Variance Partition Coefficient of Litter = 0.224.

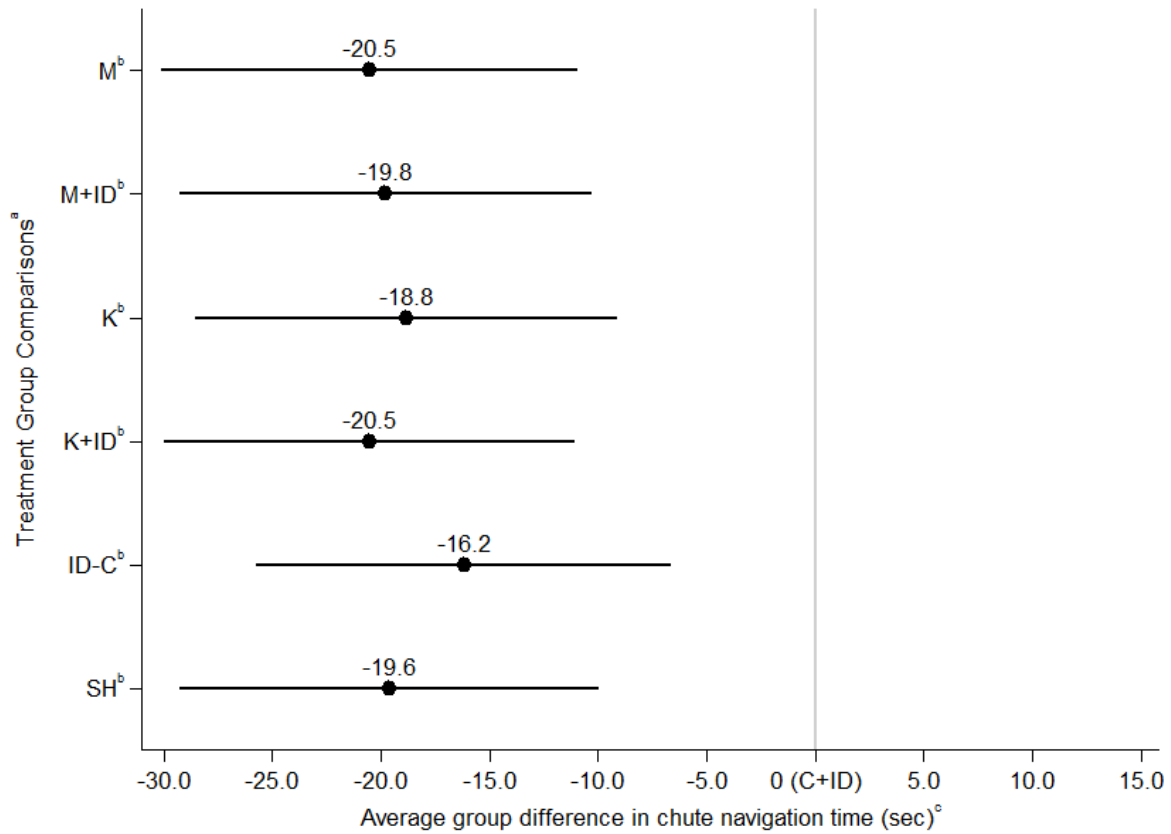

**Figure S1.** Comparison of navigation time (sec) at 15 min post-castration between treatment groups using simple linear regression, controlling for fixed effects of navigation timepoint, baseline navigation time, back test score and batch. <sup>a</sup>Treatment Groups: M = castration + meloxicam, M+ID = castration + meloxicam + iron dextran, K = castration + ketoprofen, K+ID = castration + ketoprofen + iron dextran, C+ID = castration without analgesia + iron dextran, ID-C = iron dextran without castration, SH = sham handling without castration or injection. <sup>b</sup>Indicates a significant difference ( $P < 0.05$ ) of treatment group from the referent category (C+ID). <sup>c</sup>0 is equivalent to the average navigation time of the referent category (C+ID); error bars on the graph representative of a 95% confidence interval.

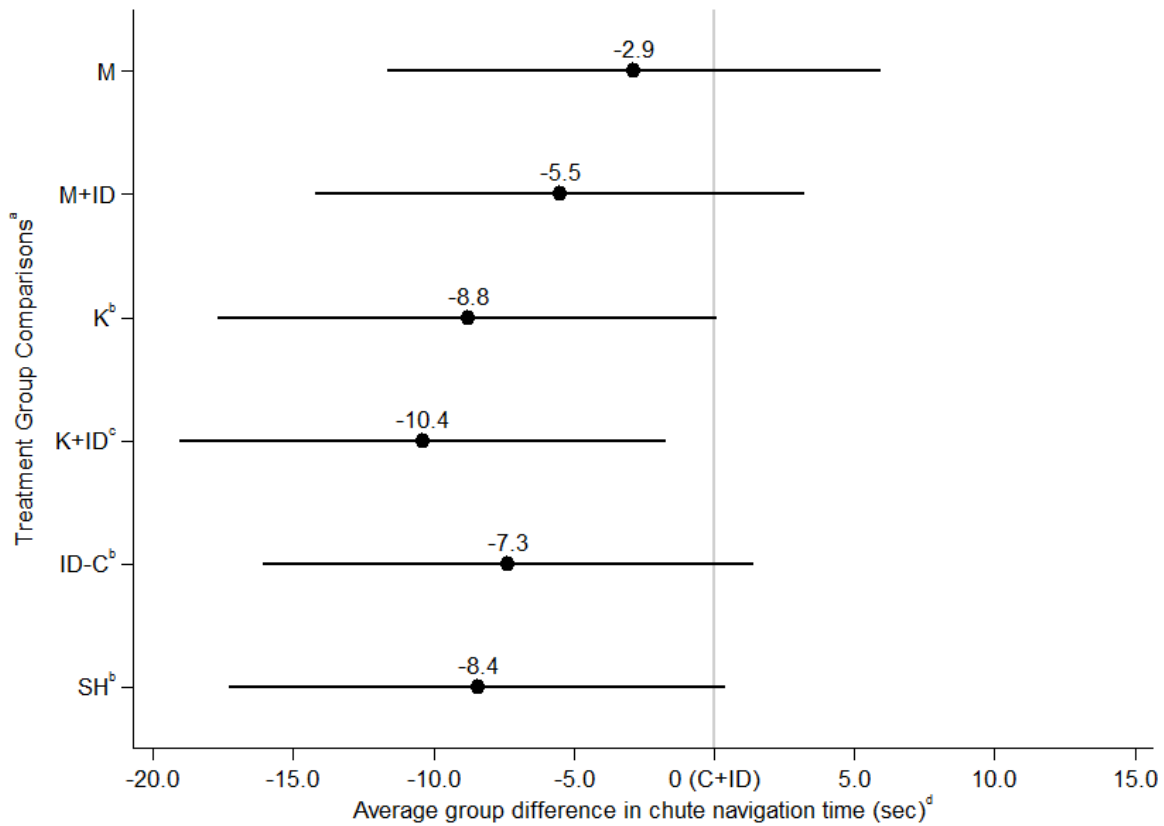

**Figure S2.** Comparison of navigation time (sec) at 30 min post-castration between treatment groups using simple linear regression, controlling for fixed effects of navigation timepoint, baseline navigation time, back test score and batch. <sup>a</sup>Treatment Groups: M = castration + meloxicam, M+ID = castration + meloxicam + iron dextran, K = castration + ketoprofen, K+ID = castration + ketoprofen + iron dextran, C+ID = castration without analgesia + iron dextran, ID-C = iron dextran without castration, SH = sham handling without castration or injection. <sup>b</sup>Indicates a trend in difference ( $P=0.05-0.10$ ) of treatment group from the referent category (C+ID). <sup>c</sup>Indicates a significant difference ( $P<0.05$ ) of treatment group from the referent category (C+ID). <sup>d</sup>0 is equivalent to the average navigation time of the referent category (C+ID); error bars on the graph representative of a 95% confidence interval.



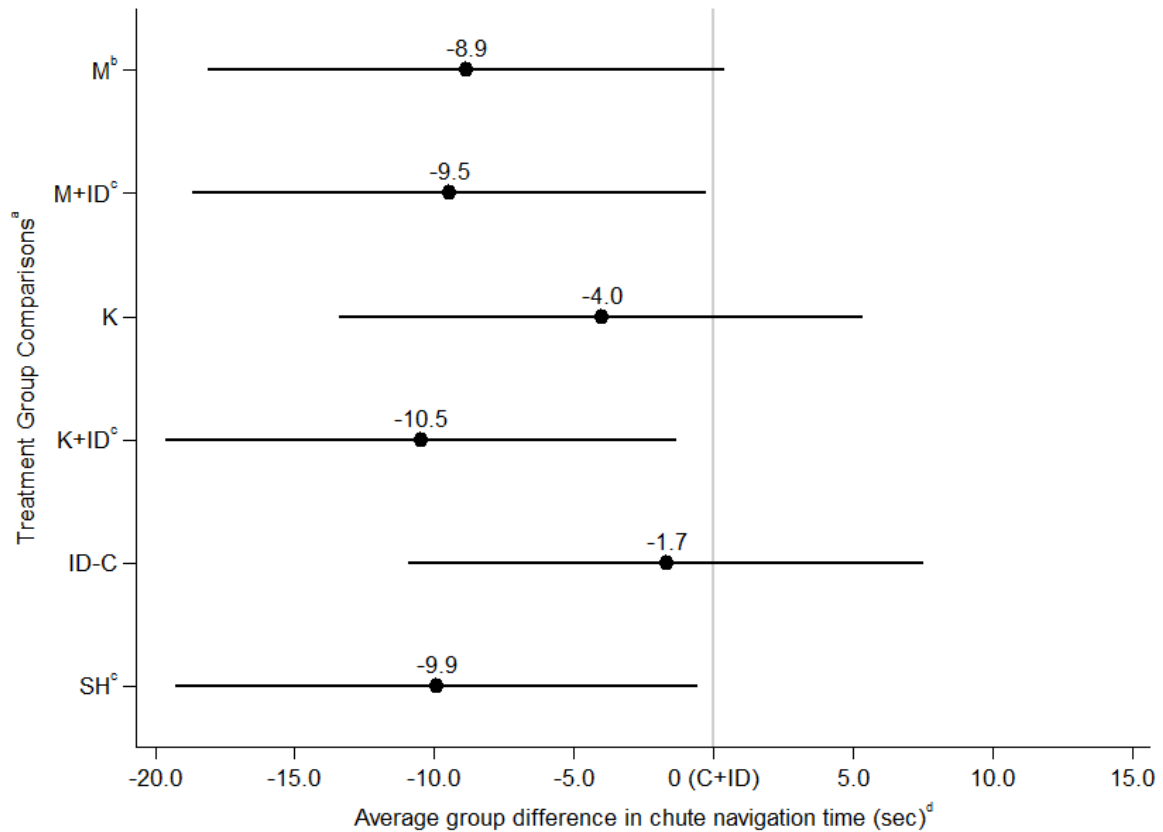

**Figure S3.** Comparison of navigation time (sec) at 1 h post-castration between treatment groups using simple linear regression, controlling for fixed effects of navigation timepoint, baseline navigation time, back test score and batch. <sup>a</sup>Treatment Groups: M = castration + meloxicam, M+ID = castration + meloxicam + iron dextran, K = castration + ketoprofen, K+ID = castration + ketoprofen + iron dextran, C+ID = castration without analgesia + iron dextran, ID-C = iron dextran without castration, SH = sham handling without castration or injection. <sup>b</sup>Indicates a trend in difference ( $P=0.05-0.10$ ) of treatment group from the referent category (C+ID). <sup>c</sup>Indicates a significant difference ( $P<0.05$ ) of treatment group from the referent category (C+ID). <sup>d</sup>0 is equivalent to the average navigation time of the referent category (C+ID); error bars on the graph representative of a 95% confidence interval.

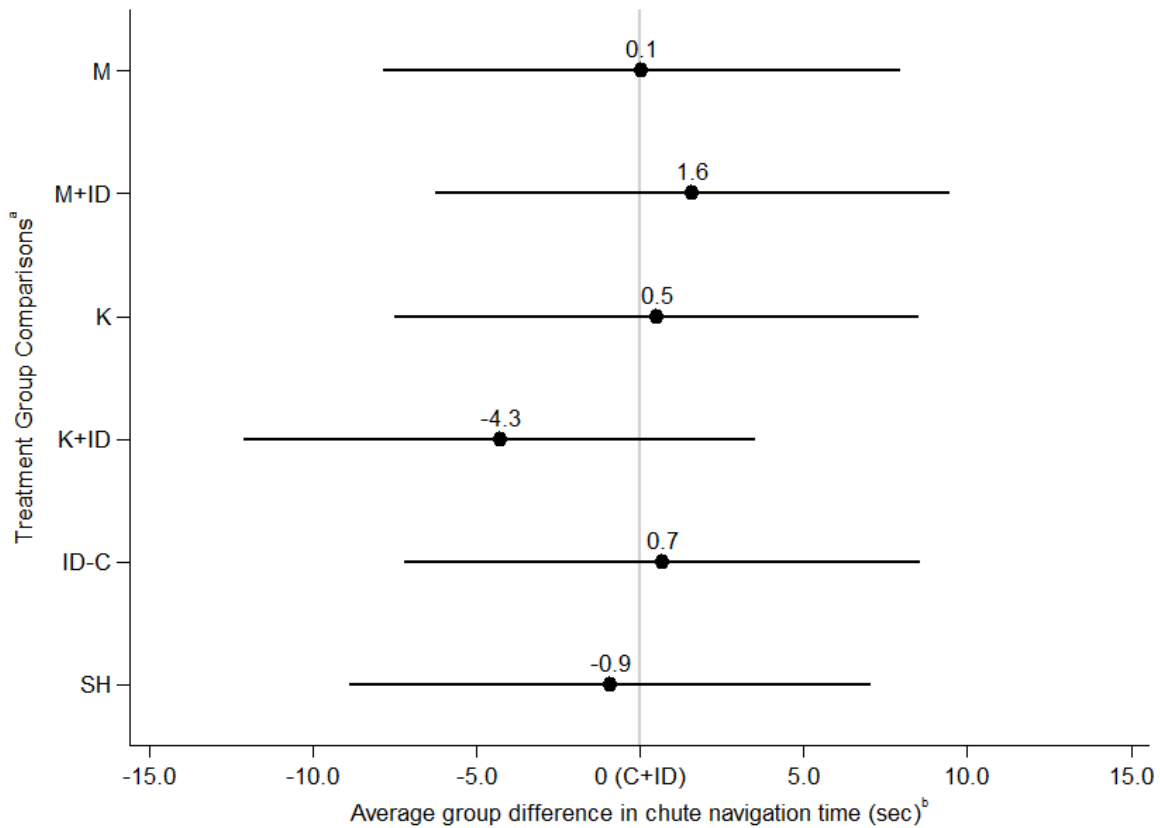

**Figure S4.** Comparison of navigation time (sec) at 4 h post-castration between treatment groups using simple linear regression, controlling for fixed effects of navigation timepoint, baseline navigation time, back test score and batch. <sup>a</sup>Treatment Groups: M = castration + meloxicam, M+ID = castration + meloxicam + iron dextran, K = castration + ketoprofen, K+ID = castration + ketoprofen + iron dextran, C+ID = castration without analgesia + iron dextran, ID-C = iron dextran without castration, SH = sham handling without castration or injection. <sup>b</sup>0 is equivalent to the average navigation time of the referent category (C+ID); error bars on the graph representative of a 95% confidence interval.

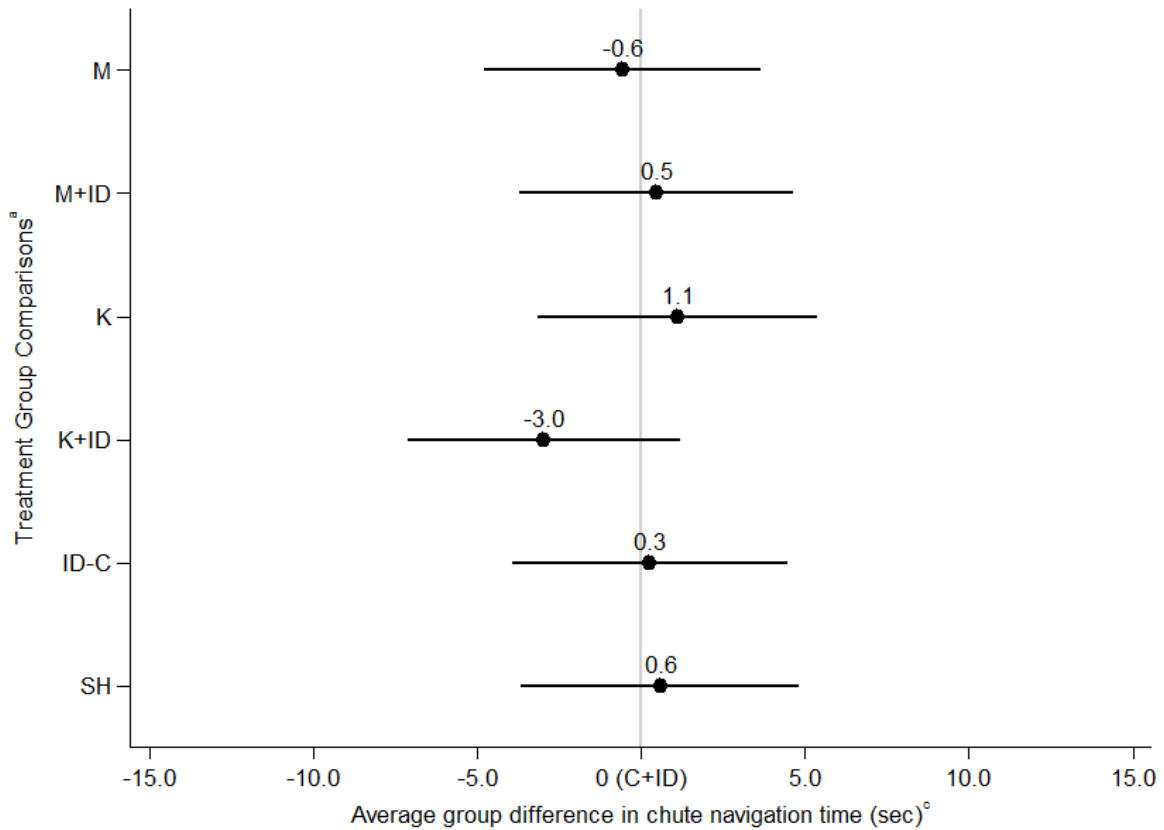

**Figure S5.** Comparison of navigation time (sec) at 24 h post-castration between treatment groups using simple linear regression, controlling for fixed effects of navigation timepoint, baseline navigation time, back test score and batch. <sup>a</sup>Treatment Groups: M = castration + meloxicam, M+ID = castration + meloxicam + iron dextran, K = castration + ketoprofen, K+ID = castration + ketoprofen + iron dextran, C+ID = castration without analgesia + iron dextran, ID-C = iron dextran without castration, SH = sham handling without castration or injection. <sup>b</sup>0 is equivalent to the average navigation time of the referent category (C+ID); error bars on the graph representative of a 95% confidence interval.

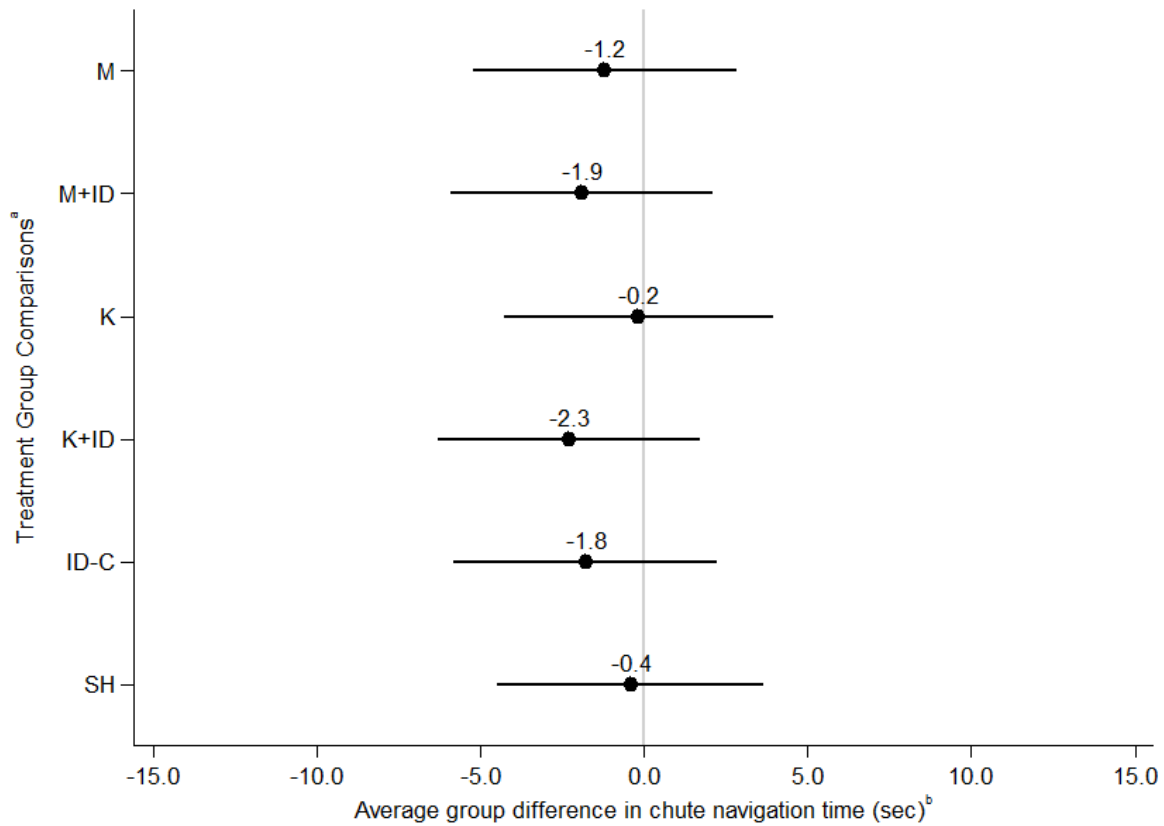

**Figure S6.** Comparison of navigation time (sec) at 30 h post-castration between treatment groups using simple linear regression, controlling for fixed effects of navigation timepoint, baseline navigation time, back test score and batch. <sup>a</sup>Treatment Groups: M = castration + meloxicam, M+ID = castration + meloxicam + iron dextran, K = castration + ketoprofen, K+ID = castration + ketoprofen + iron dextran, C+ID = castration without analgesia + iron dextran, ID-C = iron dextran without castration, SH = sham handling without castration or injection. <sup>b</sup>0 is equivalent to the average navigation time of the referent category (C+ID); error bars on the graph representative of a 95% confidence interval.
